# Supplementary material
Source: PubMed Central journal article supplement (PMC3557061)
Supplement: 1216776110_pnas.201216776SI.pdf [file 1216776110_pnas.201216776SI.pdf]

# Supporting Information

Giachi et al. 10.1073/pnas.1216776110

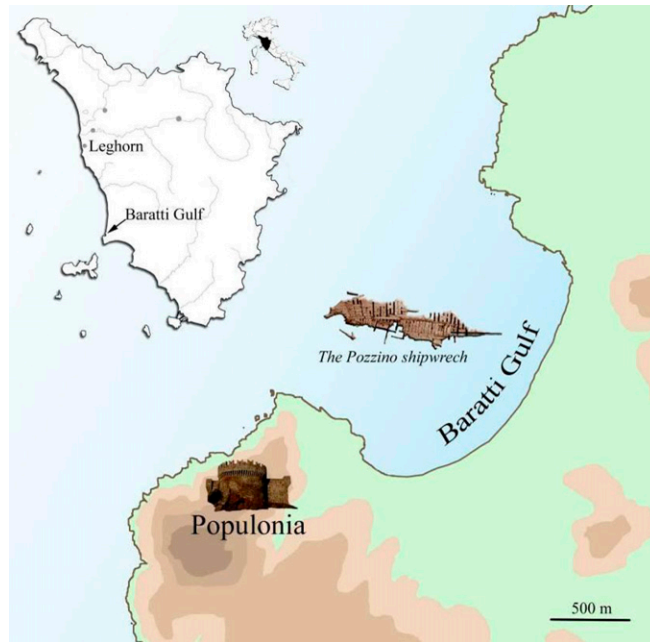

Fig. S1. Baratti Gulf near Populonia (Tuscany, Italy), where the Pozzino shipwreck was discovered.

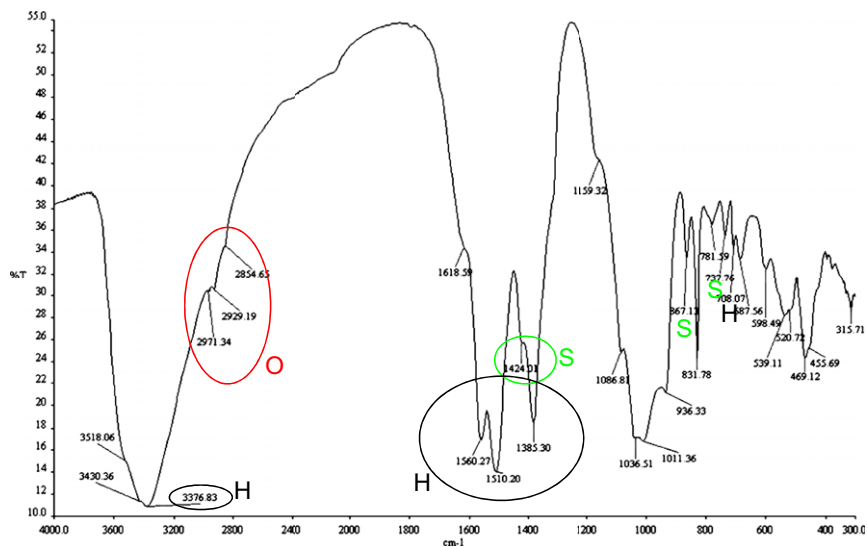

Fig. S2. FTIR spectrum of a subsample collected from the Pozzino tablet. H, hydrozincite; O, organic compounds; S, smithsonite.
